# Supplementary material
Source: PubMed Central journal article supplement (PMC7462085)
Supplement: NIHMS1585639-supplement-1.pdf [file NIHMS1585639-supplement-1.pdf]

**Supplementary Information of Guo et al. \_List of primers and sgRNAs**

|                | <b>Name</b>          | <b>Sequence</b>            | <b>Source</b>    |
|----------------|----------------------|----------------------------|------------------|
| <b>sgRNAs</b>  | UHRF1_sg1_ss         | caccgTGCTCGGGACACGAACATGG  | Brunello Library |
|                | UHRF1_sg1_as         | aaacCCATGTTCTGTCCCCGAGCAc  | Brunello Library |
|                | UHRF1_sg2_ss         | caccgCTACAACCCCGACAACCCCA  | Brunello Library |
|                | UHRF1_sg2_as         | aaacTGGGGTTGTCTGGGGTTGTAGc | Brunello Library |
|                | DNMT1_sg1_ss         | caccgGCTCTACTGGAGCGACGAGG  | Brunello Library |
|                | DNMT1_sg1_as         | aaacCCTCGTCGCTCCAGTAGAGCc  | Brunello Library |
|                | DNMT1_sg2_ss         | caccgGAGGCAAAAAGAAATCCCCA  | Brunello Library |
|                | DNMT1_sg2_as         | aaacTGGGGATTTCTTTTTGCCTCc  | Brunello Library |
|                | RING1_sg1_ss         | caccgTAAGATCTATCCTAGCCGGG  | Brunello Library |
|                | RING1_sg1_as         | aaacCCCGGCTAGGATAGATCTTAc  | Brunello Library |
|                | RING1_sg2_ss         | caccgGACCACAACGATGAGTGGGG  | Brunello Library |
|                | RING1_sg2_as         | aaacCCCCACTCATCGTTGTGGTCc  | Brunello Library |
|                | SCML2_sg1_ss         | caccgAGGTTACGTTACGACTGGA   | Brunello Library |
|                | SCML2_sg1_as         | aaacTCCAGTCGTAACCGTAACCTc  | Brunello Library |
|                | SCML2_sg2_ss         | caccgCCTGTGAATGATTTCAAAGT  | Brunello Library |
|                | SCML2_sg2_as         | aaacACTTTGAAATCATTACAGGc   | Brunello Library |
| <b>qPCR</b>    | Cp F                 | GGCGGGAGAAGGAATAACG        | PMID: 28794029   |
|                | Cp R                 | CTTGAGCTCTTATTGGCTATAATCC  | PMID: 28794029   |
|                | LMP1p F              | TCCAGAATTGACGGAAGAGGTT     | PMID: 28794029   |
|                | LMP1p R              | GCCACCGTCTGTCATCGAA        | PMID: 28794029   |
|                | LMP1p Set2 F         | AGGCAGTTGAGGAAAGAAGG       | PMID: 24257606   |
|                | LMP1p Set2 R         | GGCCTACATCCCAAGAAACA       | PMID: 24257606   |
|                | LMP2p F              | AAGCGGGCAGAGGAAGTATG       | PMID: 28794029   |
|                | LMP2p R              | AAAGAGGTAGGGCGCAACAA       | PMID: 28794029   |
|                | BZLF1p F             | GCAAGGTGCAATGTTTGTAGTGTGTT | PMID: 28794029   |
|                | BZLF1p R             | GCTGGTGCCTTGGCTTTAAAG      | PMID: 28794029   |
|                | Qp F                 | AAATTGGGTGACCACTGAGGGAGT   | PMID: 28794029   |
|                | Qp R                 | ATAGCATGTATTACCCGCCATCCG   | PMID: 28794029   |
|                | Wp F                 | AGTGGGCTTGTGTTGTGACT       | This study       |
|                | Wp R                 | TGACAATTGGCTGCTGTCT        | This study       |
|                | TRAF1p F             | ATGTACATTGTGGCGGTAAGA      | This study       |
|                | TRAF1p R             | AGGTCATCTGGCCTGAGATA       | This study       |
| STAT3p F       | GAACGAGCTGGCCTTTCA   | This study                 |                  |
| STAT3p R       | CTCCGGAAACCGCTGAATTA | This study                 |                  |
| <b>qRT-PCR</b> | LMP1 transcript F    | TGAGTGACTGGACTGGAGGA       | This study       |
|                | LMP1 transcript R    | GATACCTAAGACAAGTAAGCA      | This study       |
|                | EBNA3C transcript F  | AAGGTGCATTTACCCACTG        | This study       |
|                | EBNA3C transcript R  | AGCAGTAGCTTGGGAACACC       | This study       |
